# Supplementary material
Source: MDPI journal article supplement (https://www.mdpi.com/2412-3811/3/3/33)
Supplement: s1 [file s1]

# Agent Based Model to Estimate Time to Restoration of Storm-Induced Power Outages

Tara Walsh, Thomas Layton, David Wanik and Jonathan Mellor

## Supplementary Materials

**Table S1.** R<sup>2</sup>, MAE and standard deviation of modeled restoration curves from Figure 2.

| Storm   | Crew Start | Search Strategy                           | Repair Time Range (hrs) | R <sup>2</sup> | MAE (customers per hour) | Standard Deviation |
|---------|------------|-------------------------------------------|-------------------------|----------------|--------------------------|--------------------|
| Storm 1 | AWC        | Most Outages                              | 1 to 7                  | 0.94           | 1521.33                  | 7101.68            |
| Storm 1 | AWC        | Nearest                                   | 1 to 7                  | 0.93           | 1656.37                  | 7476.97            |
| Storm 1 | AWC        | Nearest within Radius                     | 1 to 7                  | 0.94           | 1666.37                  | 7144.03            |
| Storm 1 | AWC        | Fastest Repair Time                       | 1 to 7                  | 0.97           | 962.35                   | 6544.29            |
| Storm 1 | AWC        | Fastest Repair Time within Radius         | 1 to 7                  | 0.95           | 2019.68                  | 7644.88            |
| Storm 1 | AWC        | Fastest Repair Time and Maximum Customers | 1 to 7                  | 0.97           | 908.9                    | 6347.44            |
| Storm 1 | Random     | Most Outages                              | 1 to 7                  | 0.9            | 1999.85                  | 7863.24            |
| Storm 1 | Random     | Nearest                                   | 1 to 7                  | 0.96           | 1334.49                  | 7202.95            |
| Storm 1 | Random     | Nearest within Radius                     | 1 to 7                  | 0.95           | 1392.28                  | 6705.20            |
| Storm 1 | Random     | Fastest Repair Time Outages               | 1 to 7                  | 0.95           | 2255.92                  | 6368.60            |
| Storm 1 | Random     | Fastest Rrepair Time within Radius        | 1 to 7                  | 0.96           | 1150.88                  | 6900.30            |
| Storm 1 | Random     | Fastest Repair Time and Most Customers    | 1 to 7                  | 0.93           | 2243.37                  | 6749.33            |
| Storm 2 | AWC        | Most Outages                              | 1 to 13                 | 0.94           | 8843.04                  | 17442.81           |
| Storm 2 | AWC        | Nearest                                   | 1 to 13                 | 0.91           | 5411.44                  | 19386.00           |
| Storm 2 | AWC        | Nearest within Radius                     | 1 to 13                 | 0.89           | 6243.71                  | 20486.54           |
| Storm 2 | AWC        | Fastest Repair Time                       | 1 to 13                 | 0.97           | 3704.87                  | 17397.89           |
| Storm 2 | AWC        | Fastest Repair Time within Radius         | 1 to 13                 | 0.91           | 5525.18                  | 17397.89           |
| Storm 2 | AWC        | Fastest Repair Time and Maximum Customers | 1 to 13                 | 0.89           | 11759.2                  | 17559.86           |
| Storm 2 | Random     | Most Outages                              | 1 to 13                 | 0.93           | 6395.96                  | 19996.08           |
| Storm 2 | Random     | Nearest                                   | 1 to 13                 | 0.91           | 5423.3                   | 18268.16           |
| Storm 2 | Random     | Nearest within Radius                     | 1 to 13                 | 0.98           | 7346.1                   | 18937.42           |
| Storm 2 | Random     | Fastest Repair Time Outages               | 1 to 13                 | 0.93           | 6804.23                  | 20918.59           |
| Storm 2 | Random     | Fastest Rrepair Time within Radius        | 1 to 13                 | 0.91           | 5321.12                  | 18313.75           |
| Storm 2 | Random     | Fastest Repair Time and Most Customers    | 1 to 13                 | 0.93           | 4264.41                  | 18501.83           |
| Storm 3 | AWC        | Most Outages                              | 1 to 9                  | 0.95           | 754.85                   | 4308.54            |
| Storm 3 | AWC        | Nearest                                   | 1 to 9                  | 0.9            | 1094.51                  | 4403.35            |
| Storm 3 | AWC        | Nearest within Radius                     | 1 to 9                  | 0.92           | 875.38                   | 3928.36            |
| Storm 3 | AWC        | Fastest Repair Time                       | 1 to 9                  | 0.97           | 662.23                   | 3941.78            |

|         |        |                                           |         |      |          |          |
|---------|--------|-------------------------------------------|---------|------|----------|----------|
| Storm 3 | AWC    | Fastest Repair Time within Radius         | 1 to 9  | 0.95 | 735.78   | 4040.33  |
| Storm 3 | AWC    | Fastest Repair Time and Maximum Customers | 1 to 9  | 0.91 | 910.71   | 4140.65  |
| Storm 3 | Random | Most Outages                              | 1 to 9  | 0.9  | 1050.98  | 4707.76  |
| Storm 3 | Random | Nearest                                   | 1 to 9  | 0.96 | 993.78   | 3500.34  |
| Storm 3 | Random | Nearest within Radius                     | 1 to 9  | 0.93 | 898.77   | 4481.08  |
| Storm 3 | Random | Fastest Repair Time Outages               | 1 to 9  | 0.74 | 1896.63  | 4683.91  |
| Storm 3 | Random | Fastest Rrepair Time within Radius        | 1 to 9  | 0.86 | 1187.06  | 4220.87  |
| Storm 3 | Random | Fastest Repair Time and Most Customers    | 1 to 9  | 0.84 | 1506.83  | 4194.73  |
| Storm 4 | AWC    | Most Outages                              | 1 to 13 | 0.91 | 9861.29  | 23484.46 |
| Storm 4 | AWC    | Nearest                                   | 1 to 13 | 0.98 | 3895.57  | 29564.30 |
| Storm 4 | AWC    | Nearest within Radius                     | 1 to 13 | 0.98 | 4061.35  | 30510.87 |
| Storm 4 | AWC    | Fastest Repair Time                       | 1 to 13 | 0.98 | 2633.03  | 25023.54 |
| Storm 4 | AWC    | Fastest Repair Time within Radius         | 1 to 13 | 0.99 | 2233.73  | 27746.07 |
| Storm 4 | AWC    | Fastest Repair Time and Maximum Customers | 1 to 13 | 0.92 | 5758     | 24257.37 |
| Storm 4 | Random | Most Outages                              | 1 to 13 | 0.86 | 12609.17 | 29146.42 |
| Storm 4 | Random | Nearest                                   | 1 to 13 | 0.99 | 2970.47  | 27930.11 |
| Storm 4 | Random | Nearest within Radius                     | 1 to 13 | 0.87 | 13248.99 | 21812.31 |
| Storm 4 | Random | Fastest Repair Time Outages               | 1 to 13 | 0.97 | 4561.43  | 26271.34 |
| Storm 4 | Random | Fastest Rrepair Time within Radius        | 1 to 13 | 0.98 | 8744.26  | 28874.69 |
| Storm 4 | Random | Fastest Repair Time and Most Customers    | 1 to 13 | 0.97 | 3468.79  | 25568.69 |
| Storm 5 | AWC    | Most Outages                              | 1 to 11 | 0.94 | 1783.42  | 6171.16  |
| Storm 5 | AWC    | Nearest                                   | 1 to 11 | 0.98 | 1219.57  | 5668.15  |
| Storm 5 | AWC    | Nearest within Radius                     | 1 to 11 | 0.95 | 1068.25  | 5896.76  |
| Storm 5 | AWC    | Fastest Repair Time                       | 1 to 11 | 0.98 | 775.01   | 4440.09  |
| Storm 5 | AWC    | Fastest Repair Time within Radius         | 1 to 11 | 0.96 | 1513.02  | 5652.65  |
| Storm 5 | AWC    | Fastest Repair Time and Maximum Customers | 1 to 11 | 0.93 | 1937.21  | 5649.18  |
| Storm 5 | Random | Most Outages                              | 1 to 11 | 0.93 | 1544.54  | 6071.35  |
| Storm 5 | Random | Nearest                                   | 1 to 11 | 0.95 | 1462.11  | 5777.63  |
| Storm 5 | Random | Nearest within Radius                     | 1 to 11 | 0.94 | 1557.19  | 5868.36  |
| Storm 5 | Random | Fastest Repair Time Outages               | 1 to 11 | 0.95 | 1646     | 5614.55  |
| Storm 5 | Random | Fastest Rrepair Time within Radius        | 1 to 11 | 0.98 | 545.18   | 5231.42  |
| Storm 5 | Random | Fastest Repair Time and Most Customers    | 1 to 11 | 0.94 | 1818.14  | 5626.37  |

**Table S2.** R<sup>2</sup>, MAE and standard deviation of modeled restoration curves from Figure 4.

| Storm   | Min. Repair Time (hrs) | Max Repair Time (hrs) | R <sup>2</sup> | MAE<br>(customers<br>per hour) | Standard Deviation |
|---------|------------------------|-----------------------|----------------|--------------------------------|--------------------|
| Storm 1 | 1                      | 1                     | 0.63           | 1003.07                        | 2725.03            |
| Storm 1 | 1                      | 2                     | 0.73           | 857.47                         | 3050.95            |
| Storm 1 | 1                      | 3                     | 0.84           | 643.95                         | 3530.35            |
| Storm 1 | 1                      | 4                     | 0.89           | 561.67                         | 3829.78            |
| Storm 1 | 1                      | 5                     | 0.93           | 416.32                         | 3983.13            |
| Storm 1 | 1                      | 6                     | 0.95           | 459.68                         | 4421.56            |
| Storm 1 | 1                      | 7                     | 0.96           | 411.92                         | 4579.69            |
| Storm 1 | 1                      | 8                     | 0.96           | 476.26                         | 4838.46            |
| Storm 1 | 1                      | 9                     | 0.95           | 560.89                         | 4955.27            |
| Storm 1 | 1                      | 10                    | 0.94           | 714.01                         | 5233.78            |
| Storm 1 | 1                      | 11                    | 0.92           | 859.6                          | 5369.46            |
| Storm 1 | 1                      | 12                    | 0.91           | 1088.06                        | 5471.15            |
| Storm 1 | 1                      | 13                    | 0.87           | 1488.5                         | 5636.25            |
| Storm 1 | 1                      | 14                    | 0.85           | 1584.62                        | 5562.23            |
| Storm 1 | 1                      | 15                    | 0.83           | 1872.21                        | 5758.82            |
| Storm 2 | 1                      | 1                     | 0.50           | 11858.84                       | 10210.04           |
| Storm 2 | 1                      | 2                     | 0.60           | 10993.52                       | 11735.52           |
| Storm 2 | 1                      | 3                     | 0.73           | 9909.29                        | 12898.46           |
| Storm 2 | 1                      | 4                     | 0.72           | 9800.92                        | 13346.71           |
| Storm 2 | 1                      | 5                     | 0.80           | 9058.81                        | 13809.08           |
| Storm 2 | 1                      | 6                     | 0.85           | 7803.49                        | 15371.46           |
| Storm 2 | 1                      | 7                     | 0.90           | 6643.03                        | 16003.26           |
| Storm 2 | 1                      | 8                     | 0.91           | 5993.78                        | 16662.68           |
| Storm 2 | 1                      | 9                     | 0.92           | 5477.39                        | 16870.57           |
| Storm 2 | 1                      | 10                    | 0.94           | 5157.44                        | 16353.06           |
| Storm 2 | 1                      | 11                    | 0.94           | 4240.07                        | 17295.84           |
| Storm 2 | 1                      | 12                    | 0.94           | 3837.29                        | 18433.79           |
| Storm 2 | 1                      | 13                    | 0.94           | 3625.22                        | 18630.13           |
| Storm 2 | 1                      | 14                    | 0.92           | 4231.45                        | 19527.39           |
| Storm 2 | 1                      | 15                    | 0.92           | 4058.23                        | 18667.35           |
| Storm 3 | 1                      | 1                     | 0.48           | 1816.28                        | 2224.29            |
| Storm 3 | 1                      | 2                     | 0.64           | 1621.16                        | 2451.39            |
| Storm 3 | 1                      | 3                     | 0.76           | 1396                           | 2790.99            |
| Storm 3 | 1                      | 4                     | 0.83           | 1254.32                        | 2920.13            |
| Storm 3 | 1                      | 5                     | 0.93           | 879.38                         | 3344.76            |
| Storm 3 | 1                      | 6                     | 0.96           | 727.13                         | 3385.62            |
| Storm 3 | 1                      | 7                     | 0.96           | 740.08                         | 3248.18            |
| Storm 3 | 1                      | 8                     | 0.98           | 405.6                          | 3728.86            |
| Storm 3 | 1                      | 9                     | 0.98           | 388.3                          | 3702.99            |
| Storm 3 | 1                      | 10                    | 0.94           | 575.03                         | 3951.83            |
| Storm 3 | 1                      | 11                    | 0.91           | 686.07                         | 3709.24            |
| Storm 3 | 1                      | 12                    | 0.93           | 656.29                         | 3886.25            |
| Storm 3 | 1                      | 13                    | 0.92           | 742.51                         | 3761.20            |

|         |   |    |      |          |          |
|---------|---|----|------|----------|----------|
| Storm 3 | 1 | 14 | 0.91 | 831.87   | 3820.70  |
| Storm 3 | 1 | 15 | 0.82 | 1307.79  | 3869.17  |
| Storm 4 | 1 | 1  | 0.38 | 14108.05 | 13417.94 |
| Storm 4 | 1 | 2  | 0.48 | 13142.39 | 15452.91 |
| Storm 4 | 1 | 3  | 0.60 | 11878.34 | 17354.63 |
| Storm 4 | 1 | 4  | 0.67 | 10880.17 | 19025.76 |
| Storm 4 | 1 | 5  | 0.76 | 9667.56  | 20419.09 |
| Storm 4 | 1 | 6  | 0.84 | 8199.64  | 22103.93 |
| Storm 4 | 1 | 7  | 0.88 | 7216.04  | 23311.13 |
| Storm 4 | 1 | 8  | 0.92 | 6137.66  | 23779.68 |
| Storm 4 | 1 | 9  | 0.96 | 4566.25  | 24926.08 |
| Storm 4 | 1 | 10 | 0.97 | 4297.78  | 25071.42 |
| Storm 4 | 1 | 11 | 0.98 | 3374.88  | 26173.87 |
| Storm 4 | 1 | 12 | 0.99 | 2363.04  | 27024.72 |
| Storm 4 | 1 | 13 | 0.99 | 2225.84  | 27353.72 |
| Storm 4 | 1 | 14 | 0.99 | 2553.41  | 27823.18 |
| Storm 4 | 1 | 15 | 0.96 | 3969.74  | 28401.46 |
| Storm 5 | 1 | 1  | 0.60 | 3434.27  | 3664.16  |
| Storm 5 | 1 | 2  | 0.70 | 2879.66  | 4342.96  |
| Storm 5 | 1 | 3  | 0.73 | 2669.25  | 4571.00  |
| Storm 5 | 1 | 4  | 0.81 | 2157.71  | 4903.62  |
| Storm 5 | 1 | 5  | 0.85 | 1940.99  | 5048.70  |
| Storm 5 | 1 | 6  | 0.90 | 1526.87  | 5395.96  |
| Storm 5 | 1 | 7  | 0.93 | 1259.45  | 5354.69  |
| Storm 5 | 1 | 8  | 0.93 | 1254.43  | 5577.81  |
| Storm 5 | 1 | 9  | 0.96 | 937.36   | 5699.48  |
| Storm 5 | 1 | 10 | 0.97 | 913.37   | 5601.22  |
| Storm 5 | 1 | 11 | 0.98 | 745.3    | 5543.55  |
| Storm 5 | 1 | 12 | 0.96 | 1053.59  | 5607.45  |
| Storm 5 | 1 | 13 | 0.95 | 1264.63  | 5670.01  |
| Storm 5 | 1 | 14 | 0.96 | 1261.82  | 5515.71  |
| Storm 5 | 1 | 15 | 0.94 | 1652.61  | 5605.91  |

---

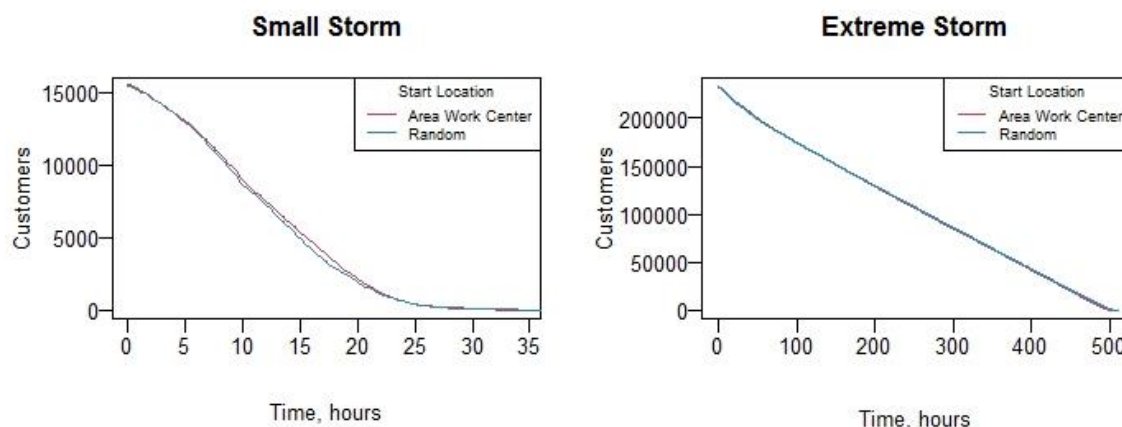

**Figure S1.** Start location for simulated small storms with 1,000 outages and extreme storms with 15,000 outages. Crew start location varied as indicated. Travel speed set to 25 mph, 272 crews with 85% working during day shift, 99% working during evening shift and 66% working during night shift, 1 to 10 hour repair time range and nearest outage search strategy. ETR curve was insensitive to crew start location.

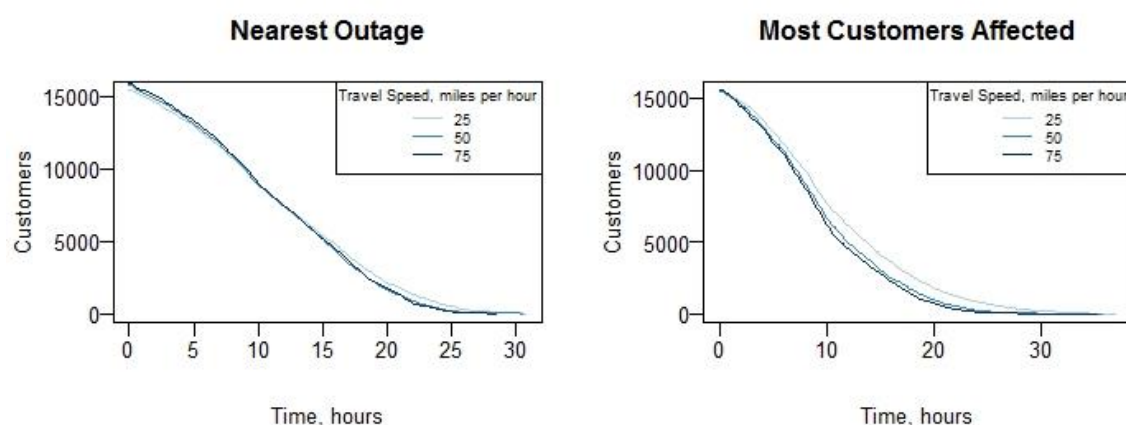

**Figure S2.** Travel speeds for simulated small storms with 1,000 outages. Crew start location set to area work center and search strategy as indicated in plot title. Travel speed set as indicated in legend. 272 crews with 85% working during day shift, 99% working during evening shift and 66% working during night shift, 1 to 10 hour repair time range. ETR curve was relatively insensitive to travel speed, but some differences are seen in the most customers affected search strategy. Nearest within radius search strategy was omitted for the small storm because it showed no differences to nearest outage search strategy.

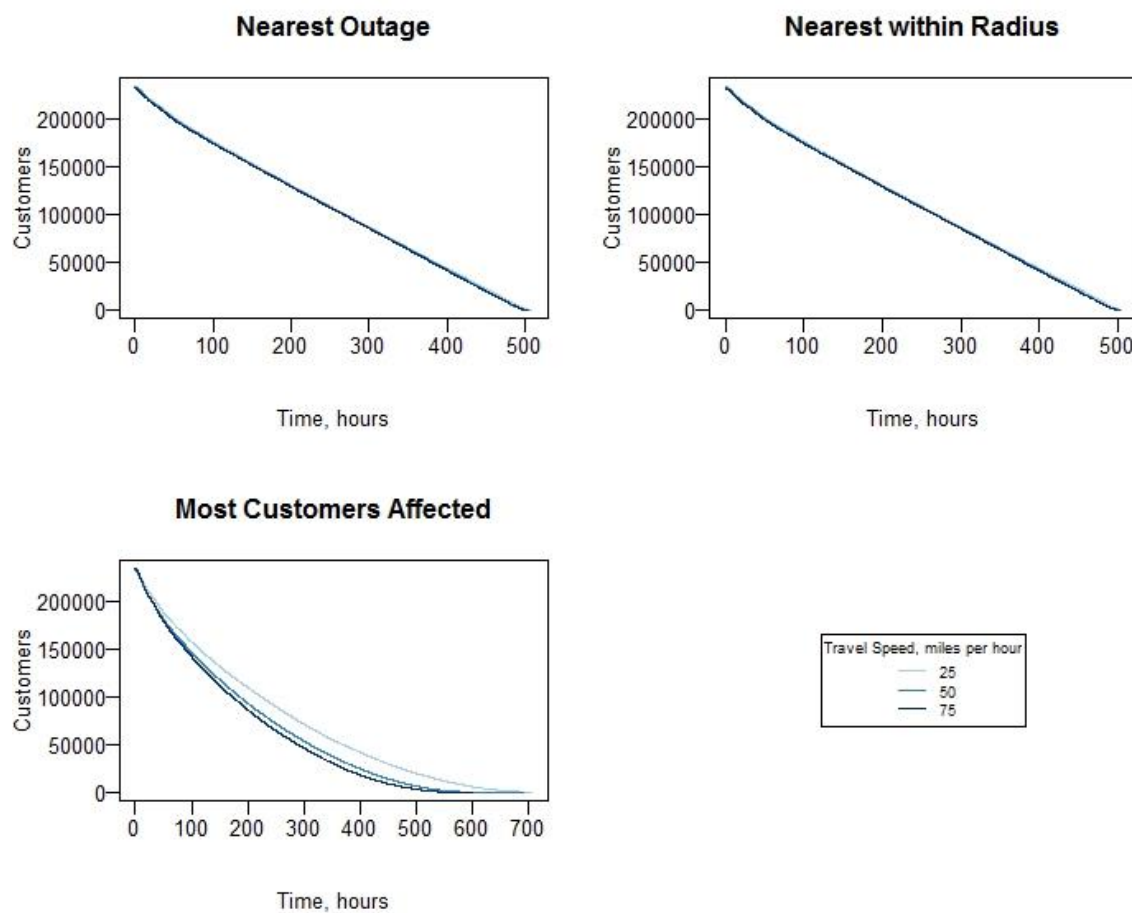

**Figure S3.** Travel speeds for simulated extreme storms with 15,000 outages. Crew start location set to area work center and search strategy as indicated in plot title. Travel speed set as indicated in legend. 272 crews with 85% working during day shift, 99% working during evening shift and 66% working during night shift, 1 to 10 hour repair time range. ETR curve was relatively insensitive to travel speed, but some differences are seen in the most customers affected search strategy.
